# Supplementary material
Source: PubMed Central journal article supplement (PMC4826006)
Supplement: supp_tpc.15.00715_TPC2015-00715-RAR2_Supplemental_Data.pdf [file supp_tpc.15.00715_TPC2015-00715-RAR2_Supplemental_Data.pdf]

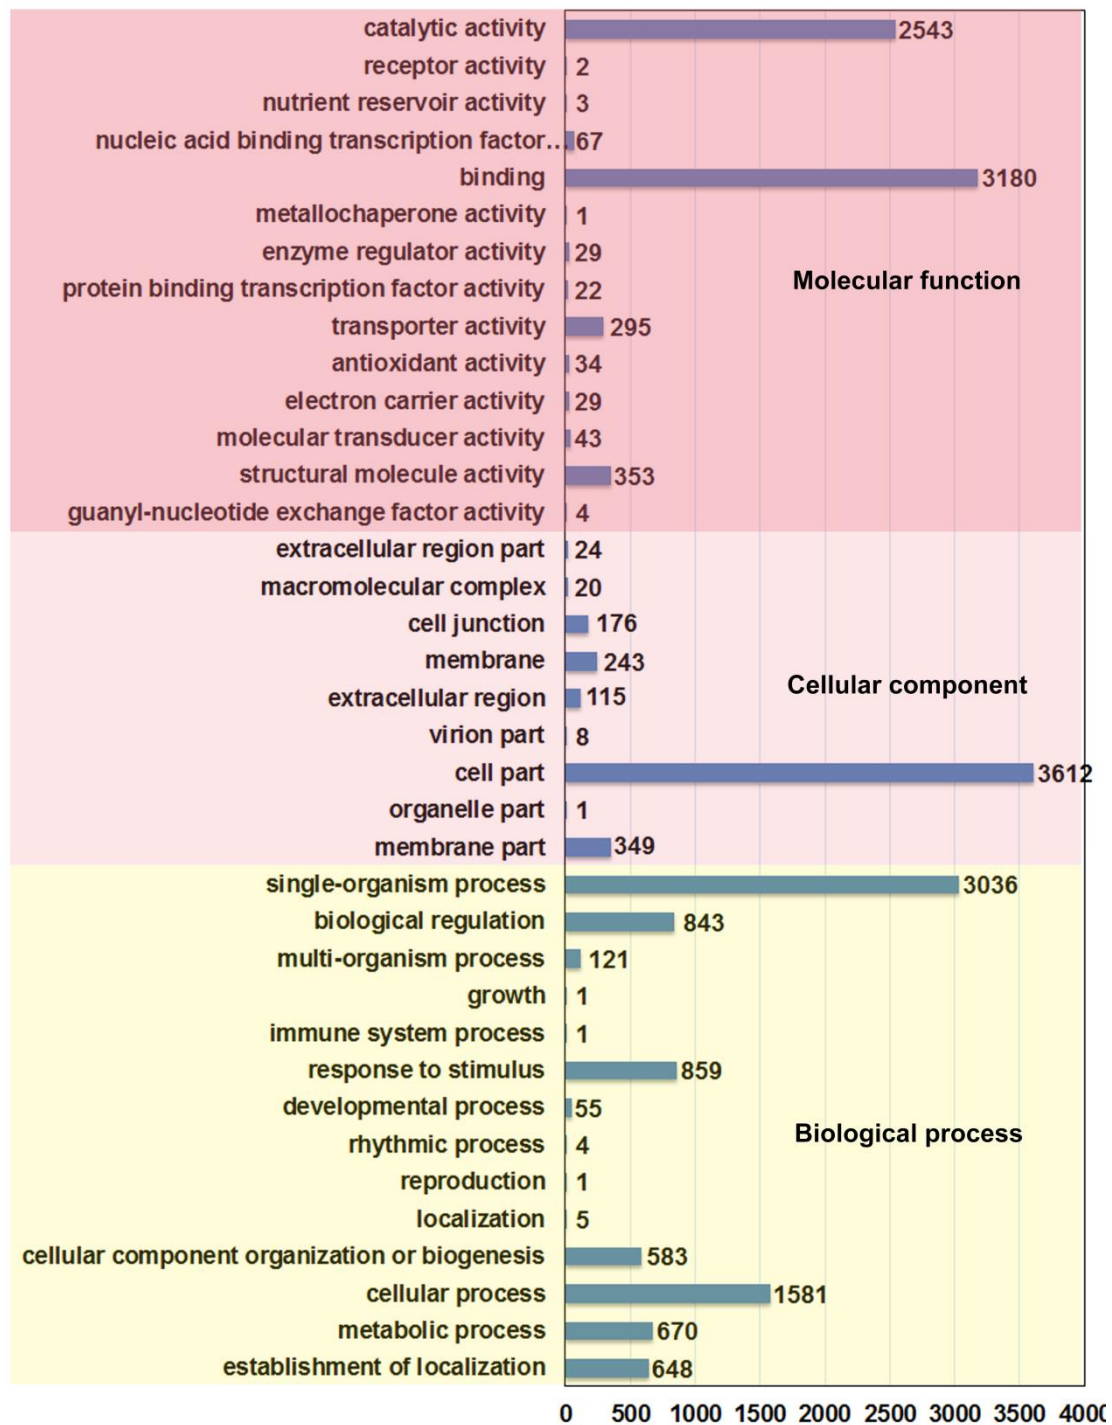

**Supplemental Figure 1.** GO Classification of Unigenes of the Glandular Trichome Transcriptome of *Leucoscepttrum canum*.

Unigenes were assigned into three main categories of GO classification: biological processes, cellular components, and molecular function.

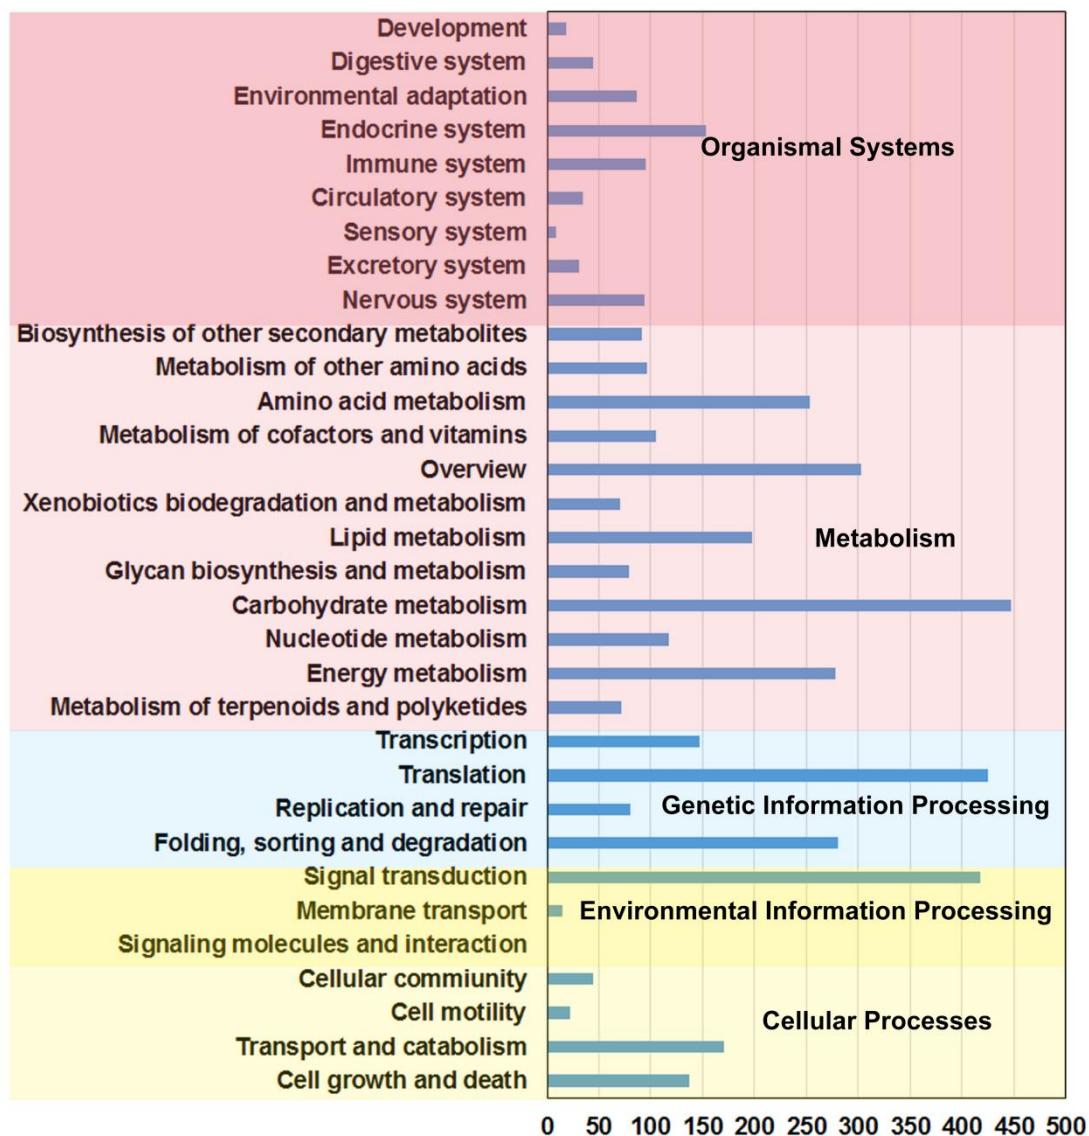

**Supplemental Figure 2.** KEGG Pathways Significantly Enriched for Unigenes of the Glandular Trichome Transcriptome of *L. canum*.

The annotated unigenes were assigned to 32 pathways, belonging to five biological processes: organismal systems, metabolism, genetic information processing, environmental information processing, and cellular processes. The represented pathways were carbohydrate metabolism (10.1%), translation (9.6%), and signal transduction (9.4%), and 1.63% of unigenes were involved in metabolism of terpenoids and polyketides.

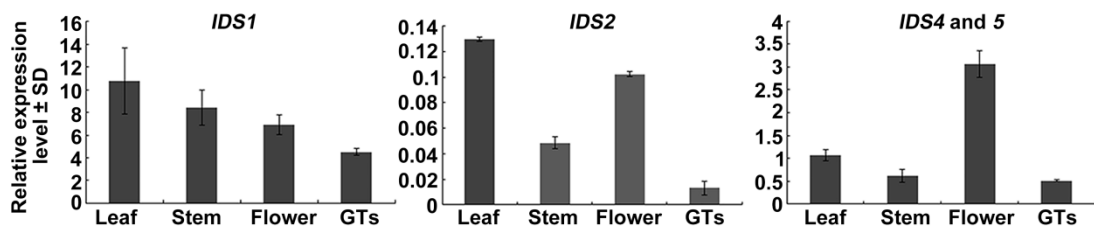

**Supplemental Figure 3.** Transcript Level Analysis of *IDS1*, *IDS2*, *IDS4* and *5* in Different Organs of *L. canum*.

GTs, glandular trichomes. All results are presented as mean  $\pm$  SD of five experimental replicates and three technical replicates.

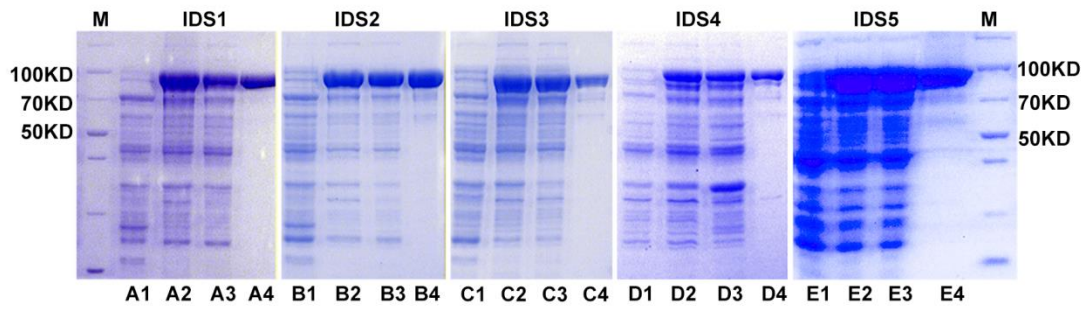

**Supplemental Figure 4.** SDS-PAGE Analysis of Recombinant Lc-IDS1-5 Proteins Expressed in *Escherichia coli*.

The proteins were visualized by Coomassie staining. M, molecular mass markers; A1-E1, crude bacterial extracts without induction by IPTG; A2-E2, crude bacterial extracts induced by IPTG; A3-E3, water-soluble protein; A4-E4, purified recombinant proteins after Ni-NTA agarose chromatography.

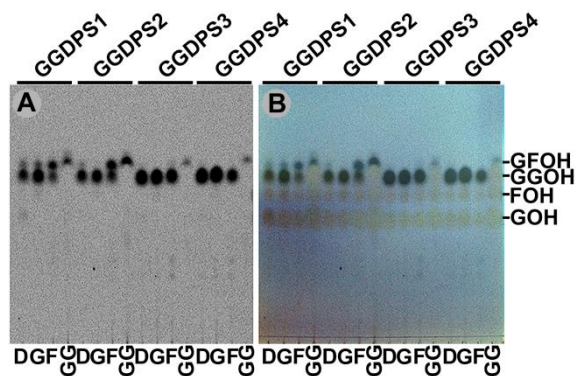

**Supplemental Figure 5.** *In vitro* Enzyme Activity Assay of GGDPs.

The *in vitro* activities of *L. canum* GGDPs were assayed using the same method as that of GFDPS by radio-TLC. <sup>14</sup>C image and merged image of <sup>14</sup>C image and iodine coloration of hydrolyzed products of assays of GGDPs performed with different allylic substrates (listed below) and [1-<sup>14</sup>C]-IPP as substrate and separated by TLC. GOH, Geraniol; FOH, farnesol; GGOH, geranylgeraniol; GFOH, geranylfarnesol were used as authentic standards and visualized by iodine coloration. D, dimethylallyl diphosphate; G, geranyl diphosphate; F, farnesyl diphosphate; GG, geranylgeranyl diphosphate indicated the different allylic substrates.

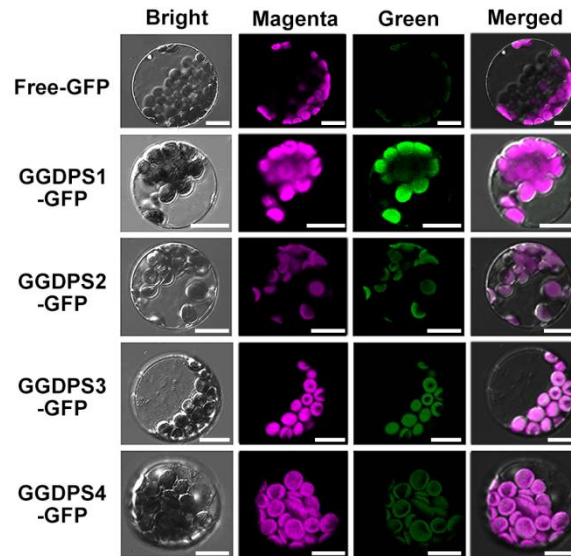

**Supplemental Figure 6.** Subcellular Localization of GGDPSs.

GFP-fusion proteins were visualized by laser confocal microscopy. Chloroplasts are represented by magenta chlorophyll autofluorescence. Green fluorescence indicates the presence of GFP. Free-GFP, GGDPS1-GFP, GGDPS2-GFP, GGDPS3-GFP and GGDPS4-GFP indicate *Arabidopsis* leaf protoplasts harboring the plasmids containing the empty vector fused to GFP, the full length cDNA of GGDPS1-4 fused to GFP respectively; Scale bar = 10  $\mu\text{m}$ .

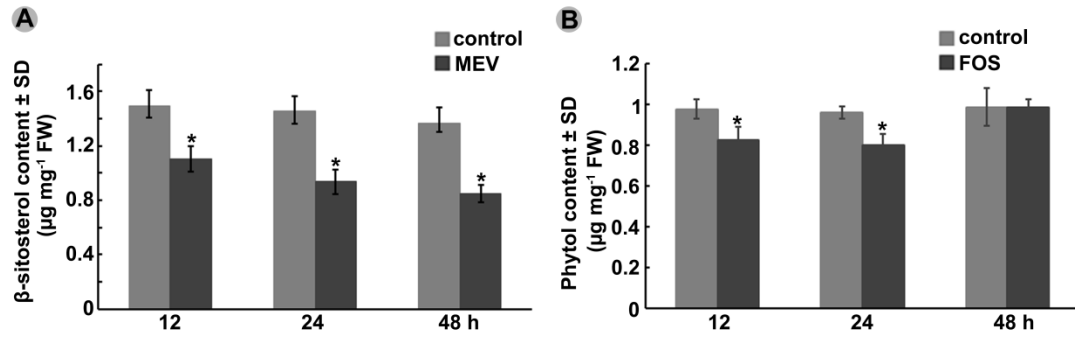

**Supplemental Figure 7.** The contents of  $\beta$ -sitosterol and phytol in the leaves of *L. canum* after MEV and FOS treatments.

Asterisks indicate significant differences from control plants ( $P < 0.05$  by significant one-way ANOVA tests;  $n=9$ ).

**Supplemental Table 1.** Enzyme Activity of Purified Recombinant GFDPs Protein Enhanced by Tween 20.

| Substrates | GFPD Peak Area (counts) |                     |
|------------|-------------------------|---------------------|
|            | Assay without Tween 20  | Assay with Tween 20 |
| GGDP+IDP   | 415±70                  | 599,000±2,000       |
| FDP+IDP    | 182±30                  | 469,000±20,000      |
| GDP+IDP    | -                       | 10,700±300          |
| DMADP+IDP  | -                       | 6,970±330           |

Results are presented as mean ± SD of three experimental replicates and four technical replicates.



**Supplemental Table 2.** Product Profiles of Purified Recombinant GFDPS Protein.

| Allylic substrate   | IDP content | Product Composition (ratio, %) |                |
|---------------------|-------------|--------------------------------|----------------|
|                     |             | GFDP                           | FFDP           |
| GGDP (100 $\mu$ M)  | 100 $\mu$ M | 89.6 $\pm$ 4.7                 | 10.4 $\pm$ 4.7 |
|                     | 300 $\mu$ M | 91.6 $\pm$ 0.09                | 8.4 $\pm$ 0.09 |
|                     | 500 $\mu$ M | 90.7 $\pm$ 0.09                | 9.3 $\pm$ 0.09 |
| FDP (100 $\mu$ M)   | 100 $\mu$ M | 87.8 $\pm$ 2.6                 | 12.2 $\pm$ 2.6 |
|                     | 300 $\mu$ M | 90.4 $\pm$ 4.2                 | 9.6 $\pm$ 4.2  |
|                     | 500 $\mu$ M | 92.1 $\pm$ 1.0                 | 7.9 $\pm$ 1.0  |
| GDP (100 $\mu$ M)   | 100 $\mu$ M | 95.2 $\pm$ 1.7                 | 4.8 $\pm$ 1.7  |
|                     | 300 $\mu$ M | 88.0 $\pm$ 6.0                 | 12.0 $\pm$ 6.0 |
|                     | 500 $\mu$ M | 80.1 $\pm$ 5.0                 | 19.9 $\pm$ 5.0 |
| DMADP (100 $\mu$ M) | 100 $\mu$ M | 100                            | 0              |
|                     | 300 $\mu$ M | 83.3 $\pm$ 8.4                 | 16.7 $\pm$ 8.4 |
|                     | 500 $\mu$ M | 77.3 $\pm$ 1.2                 | 22.7 $\pm$ 1.2 |

Results are presented as mean  $\pm$  SD of three experimental replicates.

**Supplemental Table 3.** Conserved Motifs Represented by Different Colored Bars.

| Motif                                                                                            | Conserved motif                           |
|--------------------------------------------------------------------------------------------------|-------------------------------------------|
|  <b>Motif 1</b> | DDPCMDNDDTRRGQPTWHKVFG                    |
|  <b>Motif 2</b> | KRVRPMLCIAACELVGGNESTAMPAACAVEMIHTMSLIHDD |
|  <b>Motif 3</b> | CMGLYFQVVDDILDCTKSSEQLGKTAGKD             |
|  <b>Motif 4</b> | AVLAGDFLFSFAFWH                           |
|  <b>Motif 5</b> | NHIPRILKKHFRGKPYVVDLLDLFNEVEFQTASGQMIDLIT |

**Supplemental Table 4.** Kinetic Parameters for the Purified Recombinant GGDPsS.

|        | DMADP                 |                                         | GDP                   |                                         | FDP                   |                                         | GGDP                  |                                         |
|--------|-----------------------|-----------------------------------------|-----------------------|-----------------------------------------|-----------------------|-----------------------------------------|-----------------------|-----------------------------------------|
|        | $K_m$ , $\mu\text{M}$ | $K_{cat}$ , $\text{S}^{-1} \times 10^3$ | $K_m$ , $\mu\text{M}$ | $K_{cat}$ , $\text{S}^{-1} \times 10^3$ | $K_m$ , $\mu\text{M}$ | $K_{cat}$ , $\text{S}^{-1} \times 10^3$ | $K_m$ , $\mu\text{M}$ | $K_{cat}$ , $\text{S}^{-1} \times 10^3$ |
| GGDPS1 | 6.13                  | 1.84                                    | 22.6                  | 4.77                                    | 5.12                  | 1.41                                    | 52.2                  | 0.14                                    |
| GGDPS2 | 8.11                  | 1.94                                    | 6.58                  | 2.47                                    | 7.39                  | 8.18                                    | 34.33                 | 0.12                                    |
| GGDPS3 | 7.94                  | 2.49                                    | 22.1                  | 9.17                                    | 10.3                  | 4.87                                    | 6.96                  | 0.95                                    |
| GGDPS4 | 7.29                  | 4.64                                    | 13.0                  | 2.28                                    | 12.7                  | 6.95                                    | 10.3                  | 0.92                                    |

Results are presented as the averages of three technical replicates.
